# Supplementary material for: 片頭痛とミトコンドリア (特集 頭痛・疼痛)
Source: MDPI journal article supplement (doi:10.3390/toxins13100708), 2002-06-01
Supplement: s1 [file s1]

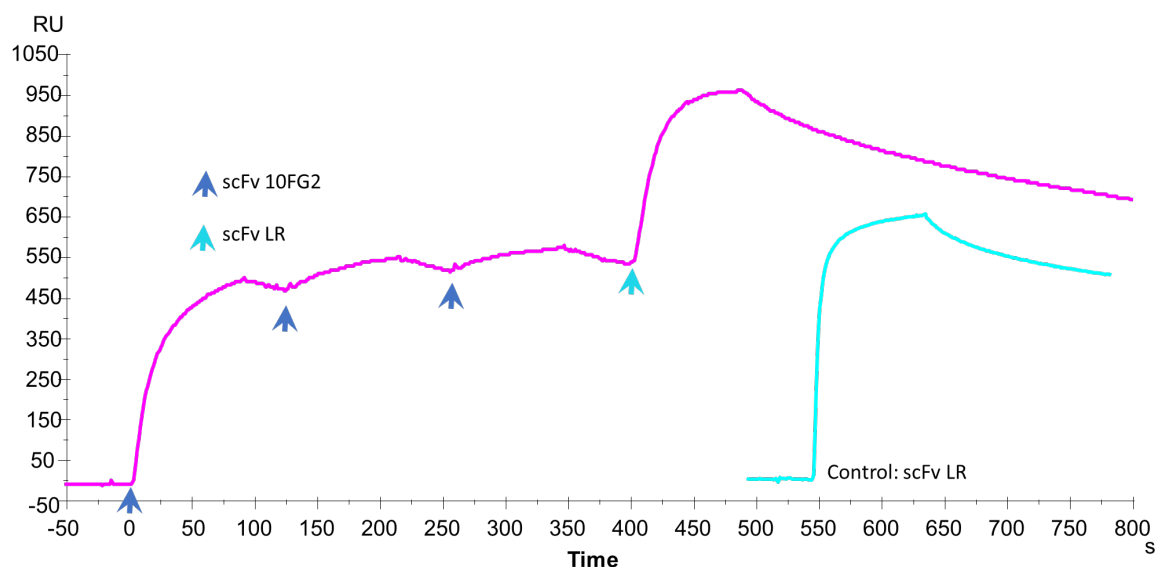

**Figure S1.** Competition analysis by SPR of scFvs 10FG2 and LR for interaction with toxin CsEd. Flow rate of 20  $\mu\text{L min}^{-1}$  and a concentration of 500 nM of each scFv. RU: Resonance Units.

**Table S1.** Comparison of interactions between scFv 10FG2 and the indicated toxins

| 10FG2 Residue<br>[atom] | Cn2 Toxin Residue<br>[atom] Å <sup>a</sup> | CsEd Toxin Residue<br>[atom] Å <sup>a</sup> | CsEM1a Toxin Residue<br>[atom] Å <sup>a</sup> |
|-------------------------|--------------------------------------------|---------------------------------------------|-----------------------------------------------|
| <b>Hydrogen Bonds</b>   |                                            |                                             |                                               |
| S31[O]                  | K35[HZ] 1.95 (9)                           | K35[HZ2] 2.30 (1)                           | K35[HZ2] 2.30 (1)                             |
| S31[OG]                 | K35[HZ] 2.21 (5)                           |                                             |                                               |
| Y53[HH]                 | K30[O] 1.76 (10)                           | R30[O] 1.73 (11)                            | R30[O] 1.87 (10)                              |
| G54[H]                  | Q31[OE1] 2.40 (2)                          | Q31[OE1] 2.31 (8)                           | Q31[OE1] 2.39 (3)                             |
| G55[H]                  |                                            | Q31[OE1] 2.19 (1)                           |                                               |
| G56[H]                  | Q31[OE1] 2.33 (4)                          | Q31[OE1] 2.36 (6)                           | Q31[OE1] 2.32 (3)                             |
| Y59[OH]                 | Q32[HE22] 2.25 (4)                         | Q32[HE22] 2.16 (2)                          | Q32[HE22] 2.37 (1)                            |
| Y59[OH]                 | K8[H] 2.26 (3)                             | K8[H] 2.29 (4)                              | S8[H] 2.13 (3)                                |
| Y59[OH]                 |                                            | Y14[HH] 1.96 (1)                            |                                               |
| Y59[HH]                 | Q32[OE1] 1.78 (6)                          | Q32[OE1] 1.80 (9)                           | Q32[OE1] 1.99 (6)                             |
| Y59[HH]                 | D7[OD2] 2.05 (2)                           |                                             | N7[OD1] 2.03 (1)                              |
| Y60[O]                  | K8[HZ] 1.91 (2)                            | K8[HZ] 2.24 (2)                             |                                               |
| Y60[O]                  | K8[HZ3] 2.04 (1)                           |                                             |                                               |
| Y60[H]                  |                                            |                                             | Y9[OH] 2.28 (6)                               |
| R101[HH]                |                                            | Q54[OE1] 2.13 (2)                           |                                               |
| D102[OD2]               | K35[H] 1.90 (10)                           | K35[H] 2.05 (6)                             | K35[H] 2.03 (2)                               |
| D102[OD1]               |                                            | K35[H] 2.10 (2)                             | K35[H] 2.11 (3)                               |
| D102[OD2]               | K35[HZ] 1.77 (11)                          | K35[HZ] 1.70 (5)                            | K35[HZ] 1.70 (3)                              |
| D102[OD]                | Y52[HH] 1.69 (9)                           | Y52[HH] 1.80 (11)                           | Y52[HH] 1.69 (9)                              |

|                                                                             |                       |                       |                       |
|-----------------------------------------------------------------------------|-----------------------|-----------------------|-----------------------|
| D102[OD1]                                                                   |                       | K8[HZ3] 1.79 (1)      |                       |
| D102[OD1]                                                                   |                       | K8[H] 1.94 (1)        |                       |
| C103[SG]                                                                    |                       | Q32[O] 3.90 (1)       | Q32[O] 3.70 (3)       |
| L104[H]                                                                     | Q32[O] 1.93 (11)      | Q32[O] 2.00 (11)      | Q32[O] 2.07 (10)      |
| L105[O]                                                                     | I56[H] 2.04 (9)       | V56[H] 2.16 (8)       | V56[H] 2.13 (10)      |
| L105[H]                                                                     | Q32[O] 2.43 (3)       |                       | Q32[O] 2.24 (5)       |
| S107[OG]                                                                    | Q54[O] 3.36 (2)       | Q54[O] 3.24 (5)       | Q54[O] 3.56 (7)       |
| S107[OG]                                                                    | Q54[HE21] 2.04 (3)    |                       |                       |
| S107[H]                                                                     | Q54[O] 2.11 (11)      | Q54[O] 1.94 (11)      | Q54[O] 2.10 (11)      |
| D108[OD]                                                                    | Q54[HE21] 2.17 (3)    | Q54[HE21] 1.93 (2)    |                       |
| T172[OG1]                                                                   | Q54[HE22] 2.07 (4)    |                       |                       |
| D233[O]                                                                     | N62[HD2] 2.00 (3)     | N62[HD21] 2.31 (3)    | N62[HD21] 2.07 (2)    |
| S234[OG]                                                                    | N62[HD22] 2.06 (1)    |                       |                       |
| T235[OG1]                                                                   |                       | N62[O] 3.85 (3)       |                       |
| T235[O]                                                                     | K8[HZ3] 2.20 (3)      | K8[HZ] 2.29(6)        |                       |
| T235[O]                                                                     |                       | K63[HZ3] 2.12 (2)     |                       |
| L236[O]                                                                     | K8[HZ] 2.04 (5)       | K8[HZ1] 2.01 (6)      |                       |
| Salt Bridges                                                                |                       |                       |                       |
| D62[OD2]                                                                    | K8[NZ] 3.50 (4)       |                       |                       |
| D102[OD2]                                                                   | K35[NZ] 2.73 (10)     | K35[NZ] 2.73 (6)      | K35[NZ] 2.67 (2)      |
| Hydrophobic Interactions within 5Å                                          |                       |                       |                       |
| Y59                                                                         |                       |                       | Y9                    |
| Y60                                                                         |                       |                       | Y9                    |
| L105                                                                        | Y33                   | Y33                   | Y33                   |
| L105                                                                        | L5                    | L5                    | L5                    |
| L105                                                                        | V6                    |                       |                       |
| L105                                                                        | I56                   | V56                   | V56                   |
| L105                                                                        | V6                    | V6                    | V6                    |
| W231                                                                        | I56                   |                       |                       |
| L236                                                                        | I56                   |                       |                       |
| L236                                                                        | L60                   | L60                   | L60                   |
| L236                                                                        | P61                   |                       |                       |
| Aromatic-Aromatic Interactions within 4.5 and 7 Angstroms [Distance, Angle] |                       |                       |                       |
| Y59                                                                         |                       |                       | Y9[5.16, 103.02] (11) |
| Aromatic-Sulfur Interactions within 5.3Å [Distance, Angle]                  |                       |                       |                       |
| C106                                                                        | Y52[5.08, 70.31] (6)  | Y52[4.57, 44.53] (8)  | Y52[4.92, 55.77] (8)  |
| C103                                                                        | Y52[5.11, 69.20] (2)  | Y52[4.87, 52.39] (9)  | Y52[5.02, 59.82] (5)  |
| C103                                                                        | Y33[5.02, 98.77] (2)  | Y33[5.22, 97.54] (1)  | Y33[5.22, 97.66] (1)  |
| Cation-Pi Interactions within 6Å [Distance, Angle]                          |                       |                       |                       |
| R101                                                                        | Y52[4.97, 22.28] (8)  | Y52[5.23, 18.68] (7)  | Y52[5.29, 17.95] (10) |
| Y53                                                                         | K35[5.38, 164.59] (9) | K35[5.12, 163.28] (5) | K35[5.19, 152.31] (6) |

|      |                      |                     |                      |
|------|----------------------|---------------------|----------------------|
| Y32  | K35[5.93, 37.01] (2) |                     |                      |
| W47  | K8[5.87, 86.41] (3)  | K8[5.88, 76.83] (3) |                      |
| Y59  | K8[5.35, 27.64] (4)  | K8[5.50, 22.82] (3) |                      |
| K65  |                      |                     | Y9[4.78, 23.00] (10) |
| W231 | K8[5.77, 70.82] (1)  | K8[5.77, 70.79] (1) |                      |

<sup>a</sup> Average distance in different frames of the sample taken from MD. The number in parentheses indicates how many times the contact was observed in the sample taken from MD. Bold letters indicate interactions with the main chain of the indicated residue.

**Table S2.** Comparison of interactions between scFv LR and the indicated toxins

| LR Residue<br>[atom] | Cn2 Toxin Residue<br>[atom] Å <sup>a</sup> | CsEd Toxin Residue<br>[atom] Å <sup>a</sup> | CsEM1a Toxin Residue<br>[atom] Å <sup>a</sup> |
|----------------------|--------------------------------------------|---------------------------------------------|-----------------------------------------------|
| Hydrogen Bonds       |                                            |                                             |                                               |
| N31[O]               |                                            | E15[H] 2.15 (15)                            |                                               |
| N31[HD2X]            |                                            | K13[O] 2.05 (17)                            |                                               |
| N31[OD1]             |                                            | N10[HD2X] 1.97 (21)                         |                                               |
| N31[HD22]            |                                            | N10[OD1] 2.17 (3)                           |                                               |
| Y32[HH]              | <b>S66</b> [O] 1.79 (4)                    | <b>S66</b> [O] 1.81 (1)                     | <b>N66</b> [O] 1.78 (1)                       |
| Y32[HH]              | S66[OG] 1.77 (1)                           |                                             |                                               |
| Y32[OH]              | C65[SG] 3.41 (1)                           | C65[SG] 3.64 (3)                            |                                               |
| Y32[HH]              | C65[O] 2.06 (2)                            |                                             |                                               |
| Y32[OH]              |                                            | C12[SG] 3.46 (3)                            |                                               |
| A33[H]               |                                            | E15[OEX] 1.86 (19)                          |                                               |
| H35[NE2]             | E15[OE2] 3.66 (1)                          | E15[OE2] 3.66 (2)                           | E15[OE2] 3.68 (4)                             |
| R53[HH1X]            | <b>D7</b> [ODX] 1.85 (24)                  | <b>N7</b> [OD1] 1.91 (4)                    | <b>N7</b> [OD1] 2.20 (2)                      |
| R53[HH11]            | K13[O] 2.05 (15)                           |                                             |                                               |
| R53[O]               | Y24[HH] 1.65 (3)                           | Y24[HH] 1.88 (1)                            | Y24[HH] 1.64 (1)                              |
| R53[HH12]            | C12[O] 2.13 (1)                            |                                             |                                               |
| R53[HH22]            |                                            | E28[OE2] 1.83 (1)                           |                                               |
| R53[HH21]            |                                            | Y14[OH] 1.98 (2)                            |                                               |
| R53[HH12]            |                                            |                                             | Y14[OH] 2.05 (1)                              |
| R53[O]               |                                            | R27[HH22] 2.27 (3)                          |                                               |
| S54[OG]              | R27[HH22] 2.18 (6)                         |                                             |                                               |
| S54[O]               | R27[HH22] 1.95 (3)                         | R27[HH22] 2.02 (11)                         |                                               |
| S55[O]               | R27[HHX2] 1.99 (4)                         | R27[HHX2] 1.79 (5)                          |                                               |
| G56[O]               |                                            |                                             | R27[HH22] 2.33 (3)                            |
| D57[ODX]             | L17[H] 1.84 (21)                           | L17[H] 1.83 (20)                            | L17[H] 1.89 (19)                              |
| D57[ODX]             | K18[H] 2.03 (19)                           | K18[H] 2.10 (19)                            | K18[H] 1.99 (18)                              |
| D57[OD1]             | K18[HZX] 1.71 (4)                          | K18[HZX] 1.71 (16)                          | K18[HZX] 1.71 (19)                            |
| D57[OD1]             |                                            | K18[NZ] 2.67 (1)                            |                                               |

|                                    |                        |                        |                        |
|------------------------------------|------------------------|------------------------|------------------------|
| D57[ODX]                           | N22[HD22] 2.00 (19)    | N22[HD22] 1.91 (15)    | N22[HD22] 1.88 (14)    |
| D57[O]                             |                        |                        | Y24[HH] 1.61 (1)       |
| I58[O]                             | K18[HZX] 1.91 (2)      | K18[HZX] 1.81 (14)     | K18[HZX] 1.94, (12)    |
| D59[OD2]                           | K18[HZ3] 1.69 (1)      |                        |                        |
| D59[OD2]                           | K18[HZ1] 1.60 (1)      | K18[HZ1] 2.03 (1)      |                        |
| R98[HH22]                          | S66[O] 2.41 (1)        |                        |                        |
| G100[H]                            | E15[OE2] 2.17 (1)      | E15[OEX] 2.15 (8)      | E15[OEX] 2.16, (8)     |
| F101[H]                            | E15[OE1] 1.18 (12)     | E15[OEX] 1.99 (9)      | E15[OEX] 2.01 (14)     |
| G102[H]                            | E15[OEX] 2.05 (14)     | E15[OEX] 2.11 (10)     | E15[OE2] 2.14 (13)     |
| R163[HH22]                         | Y42[OH] 1.78 (1)       |                        |                        |
| R163[HH11]                         | Y42[OH1] 2.10 (1)      |                        |                        |
| Y165[HH]                           | Y4[OH] 2.32 (1)        |                        | Y4[OH] 2.09 (4)        |
| Y165[OH]                           | Y42[HH] 2.07 (1)       |                        |                        |
| R229[HHX2]                         | E15[OEX] 1.88 (34)     | E15[OEX] 1.96 (38)     | E15[OEX] 1.87 (31)     |
| R229[HH21]                         | C16[O] 2.28 (2)        | C16[O] 2.33 (1)        | C16[O] 2.50 (1)        |
| Salt Bridges                       |                        |                        |                        |
| H35[NE2]                           | E15[OEX] 3.78 (4)      | E15[OEX] 3.66 (2)      | E15[OEX] 3.74 (9)      |
| R53[ <sup>+</sup> NH1]             | D7[OD2] 3.28 (11)      |                        |                        |
| R53[ <sup>+</sup> NH1]             | D7[OD1] 3.87 (5)       |                        |                        |
| R53[NH2]                           | D7[OD2] 2.79 (13)      |                        |                        |
| R53[NH2]                           | D7[OD1] 3.18 (10)      |                        |                        |
| R53[ <sup>+</sup> NH1]             |                        | E28[OE2] 2.81 (1)      |                        |
| R53[ <sup>+</sup> NH2]             |                        | E28[OE2] 2.81 (1)      |                        |
| D57[ODX]                           | K18[NZ] 2.73 (7)       | K18[NZ] 2.81 (18)      | K18[NZ] 2.71 (19)      |
| R98[NHX]                           | <b>S66[O]</b> 3.23 (1) | <b>S66[O]</b> 3.79 (1) | <b>N66[O]</b> 3.58 (2) |
| R229[NHX]                          | E15[OEX] 3.16 (39)     | E15[OE2] 2.92 (39)     | E15[OE2] 2.81 (37)     |
| Hydrophobic Interactions within 5Å |                        |                        |                        |
| A33                                | L17 (9)                | L17 (18)               | L17 (10)               |
| W47                                | L17 (4)                | L17 (11)               | L17 (12)               |
| I51                                |                        |                        | L17 1                  |
| F101                               | A45 (2)                | A45 (19)               | A45 (13)               |
| F101                               |                        | F44 (8)                |                        |
| F101                               |                        |                        | W58 (1)                |
| Y165                               | Y4 (1)                 |                        | Y4 (4)                 |
| Y165                               | Y42 (14)               | Y42 (3)                | Y42 (11)               |
| Y165                               | A43 (19)               | A43 (13)               | A43 (19)               |
| Y224                               | F44 (20)               | F44 (20)               | F44 (18)               |
| Y224                               | A43 (4)                | A43 (2)                | A43 (3)                |
| Y226                               | L19 (2)                | L19 (1)                | L19 (2)                |

| Aromatic-Aromatic Interactions within 4.5 and 7 Angstroms [Distance, Angle] |                       |                         |                        |
|-----------------------------------------------------------------------------|-----------------------|-------------------------|------------------------|
| W47                                                                         |                       | F44 [6.80; 100.67] (1)  | F44 [6.74; 126.53] (1) |
| F101                                                                        |                       | W58 [6.97; 109.02] (1)  | W58 [6.05; 100.86] (1) |
| Y165                                                                        | Y42[6.47; 86.29] (13) | Y42 [6.27; 87.96] (4)   | Y42 [6.47; 84.29](13)  |
| Y65                                                                         |                       |                         | Y4[6.82; 80.36] (1)    |
| Y224                                                                        | F44[6.77; 105.36] (6) | F44[6.93 ; 110.57] (1)] | F44 [6.87; 119.96] (2) |
| Aromatic-Sulfur Interactions within 5.3Å [Distance, Angle]                  |                       |                         |                        |
| Y32                                                                         | C12[5.01; 32.08] (3)  | C12[5.16 ; 56.54] (1)   |                        |
| Y32                                                                         | C65[4.74; 48.75] (17) | C65[4.80 ; 50.80] (1)   | C65 [4.55; 61.04] (1)  |
| F101                                                                        | C65[5.28; 72.12] (17) | C65[4.52 ; 90.00] (2)   | C65 [4.62; 70.78] (7)  |
| F101                                                                        | C12[5.04; 56.73] (1)  |                         | C12 [4.92; 57.80] (2)  |
| Cation-Pi Interactions within 6Å [Distance, Angle]                          |                       |                         |                        |
| R53                                                                         | Y14[3.92; 17.28] (20) | Y14 [5.23; 126.92] (17) | Y14 [5.03; 135.42](9)  |
| F101                                                                        | K13[5.55; 53.05] (7)  | K13 [5.08; 33.29] (18)  | K13 [5.41; 46.96] (8)  |
| Y165                                                                        |                       |                         | K13[5.86; 90.18 ] (1)  |
| R225                                                                        |                       | Y42 [5.51; 99,76] (3)   | Y42 [5.15; 71.17](5)   |
| R229                                                                        | F44[4.58; 40.18] (19) | F44 [4.50; 28.30] (20)  | F44 [4.34; 30.66](19)  |

<sup>a</sup> Average distance in different frames of the sample taken from MD.

The number in parentheses indicates how many times the contact was observed in the sample taken from MD.

Bold letters indicate interactions with the main chain of indicated residue.

**Table S3.** Temperature B factors of the first 20 residues of toxins CsEM1a and CsEd and their difference during interaction with scFv 10FG2

|         |   | <b>CsEM1a</b>  |   | <b>CsEd</b>   | <b>Difference</b> |
|---------|---|----------------|---|---------------|-------------------|
| Residue |   | B factor       |   | B factor      | CsEM1a-CsEd       |
| 1       | K | 167.6296969387 | K | 35.302643674  | 132.3270532647    |
| 2       | E | 18.054839999   | E | 19.262340288  | -1.207500289      |
| 3       | G | 5.0506361493   | G | 4.4643463912  | 0.5862897581      |
| 4       | Y | 5.9322012627   | Y | 5.2696473751  | 0.6625538876      |
| HH 5    | L | 19.9735798205  | L | 16.7065914745 | 3.2669883459      |
| HH 6    | V | 14.8477939047  | V | 15.6693531253 | -0.8215592207     |
| C 7     | N | 36.0077170784  | N | 39.8229365656 | -3.8152194872     |
| CC 8    | S | 32.8495186243  | K | 40.3840991739 | -7.5345805496     |
| C 9     | Y | 25.3281339078  | S | 49.2956494218 | -23.9675155141    |
| 10      | T | 19.321280032   | N | 34.4138114961 | -15.0925314641    |
| 11      | G | 8.2076367038   | G | 10.9841040141 | -2.7764673103     |
| 12      | C | 7.7108895193   | C | 10.4611618013 | -2.750272282      |
| 13      | K | 35.2774719618  | K | 38.9140703605 | -3.6365983987     |
| C 14    | Y | 57.3110461853  | Y | 49.485018431  | 7.8260277543      |
| 15      | E | 38.5993317058  | E | 35.0650328579 | 3.5342988479      |
| 16      | C | 5.9607549183   | C | 5.1599951324  | 0.8007597859      |
| 17      | L | 50.2558412015  | L | 53.5181320732 | -3.2622908717     |
| 18      | K | 73.2126242526  | K | 80.8775249039 | -7.6649006513     |
| 19      | L | 25.1397119297  | L | 20.7111697703 | 4.4285421594      |
| 20      | G | 8.0152927149   | G | 6.8558417737  | 1.1594509412      |
